# Supplementary material for: Non-Indigenous Species on Artificial Coastal Environments: Experimental Comparison between Aquaculture Farms and Recreational Marinas
Source: MDPI journal article supplement (doi:10.3390/jmse9101121), 2021-10-14
Supplement: s1 [file s1]

Supplementary figure captions:

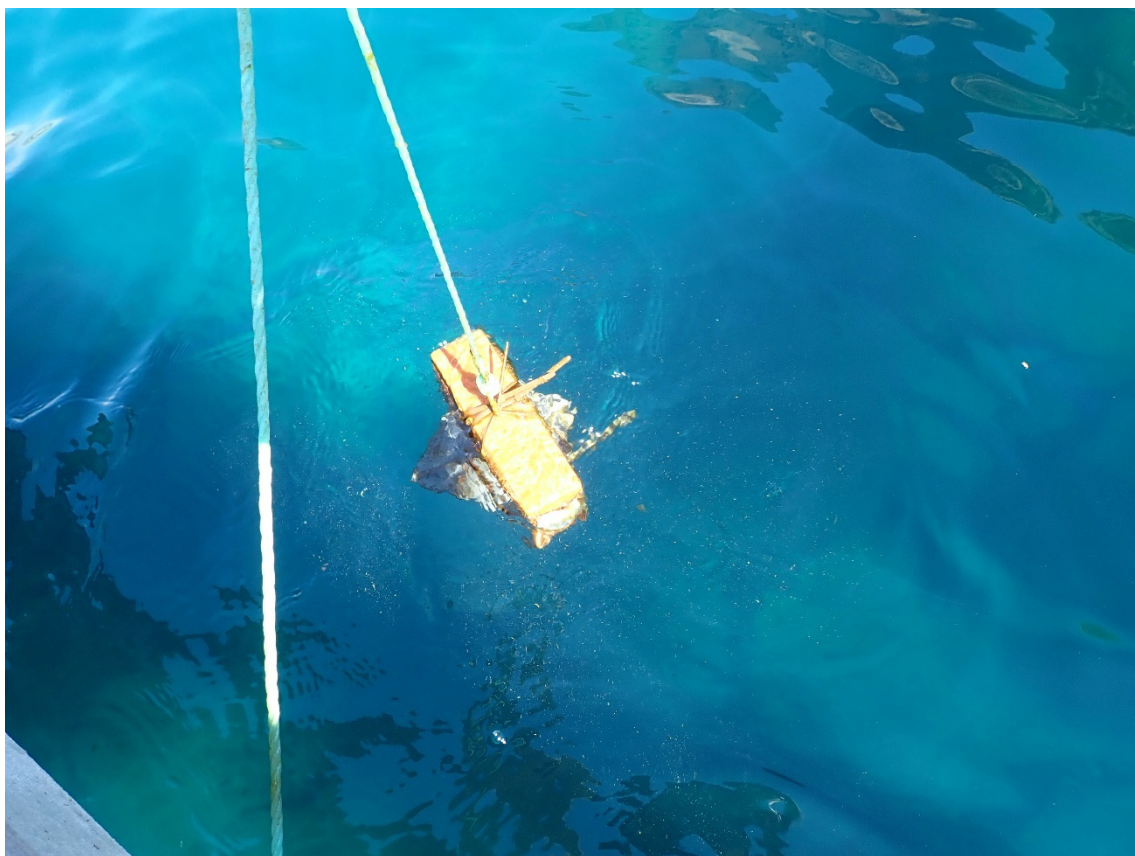

**Figure S1.** PVC plate (experimental unit). Credits: P. Ramalhosa.

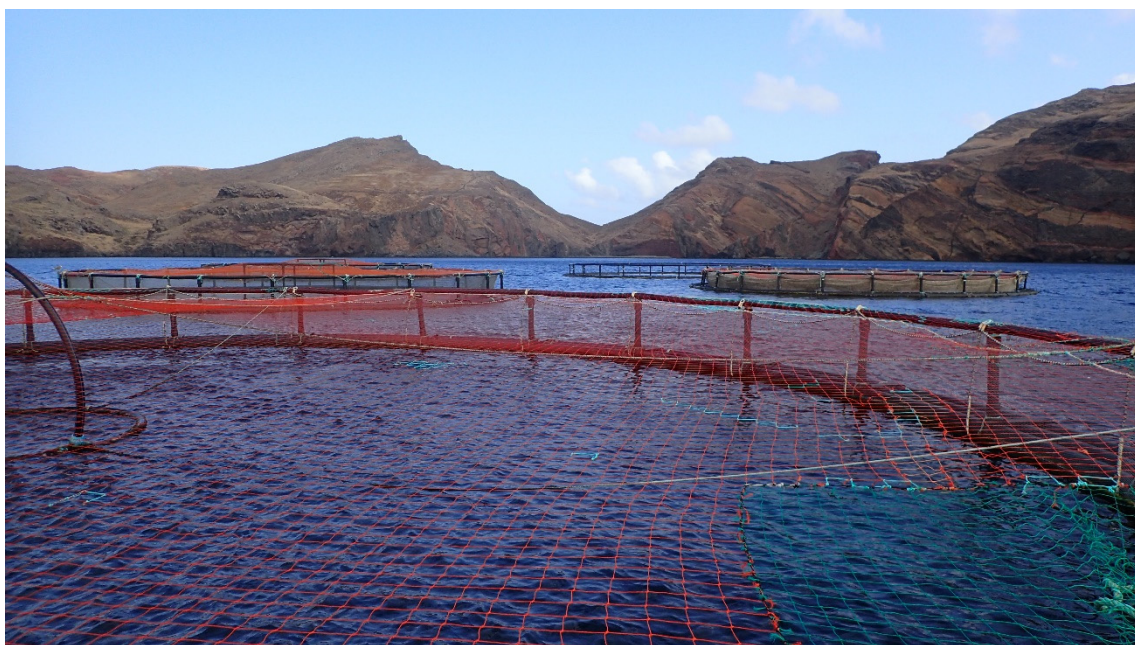

(a)



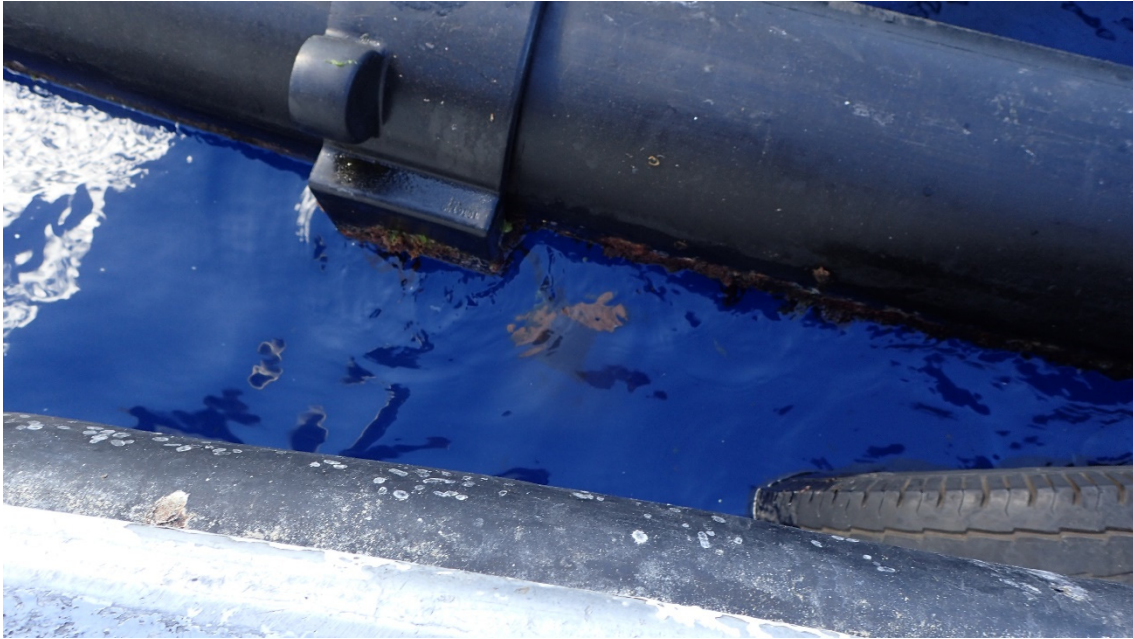

(b)

**Figure S2. a) Aquaculture operation, b) Experimental unit deployed at aquaculture sea-cages.**

Credits: P. Ramalhosa.

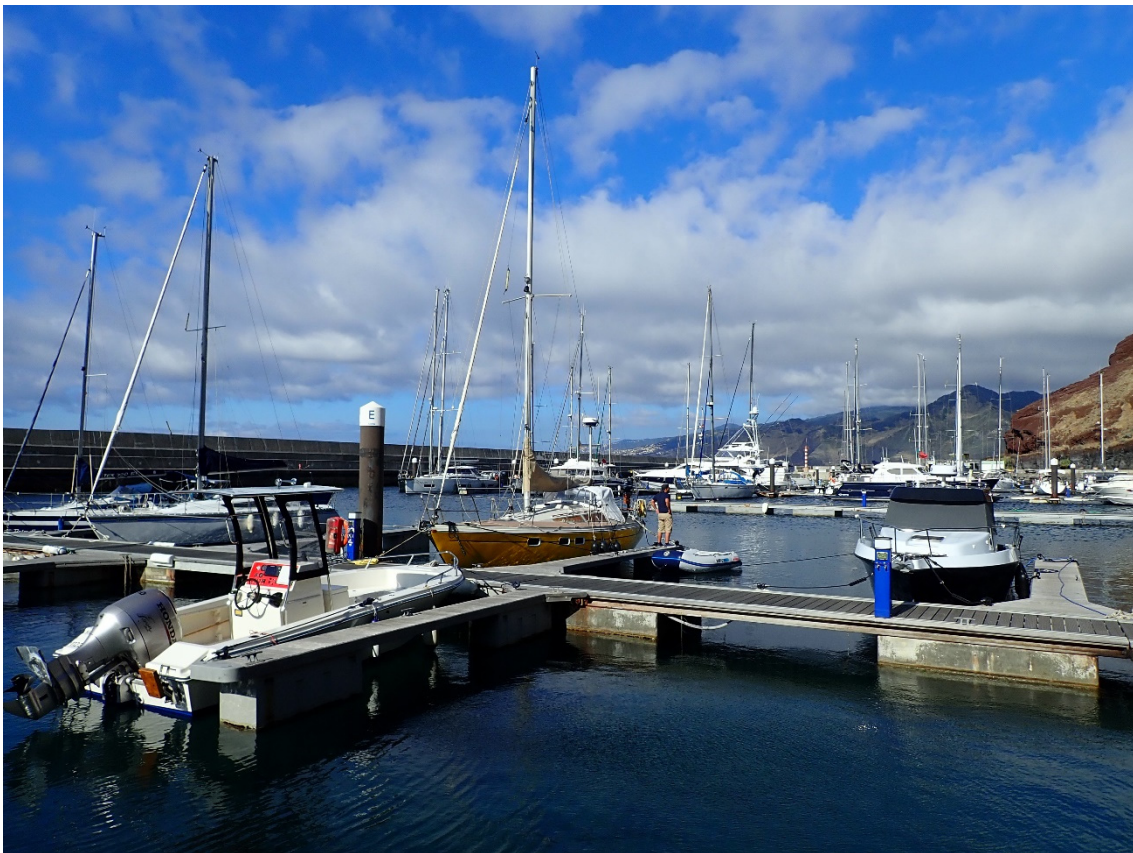

(a)

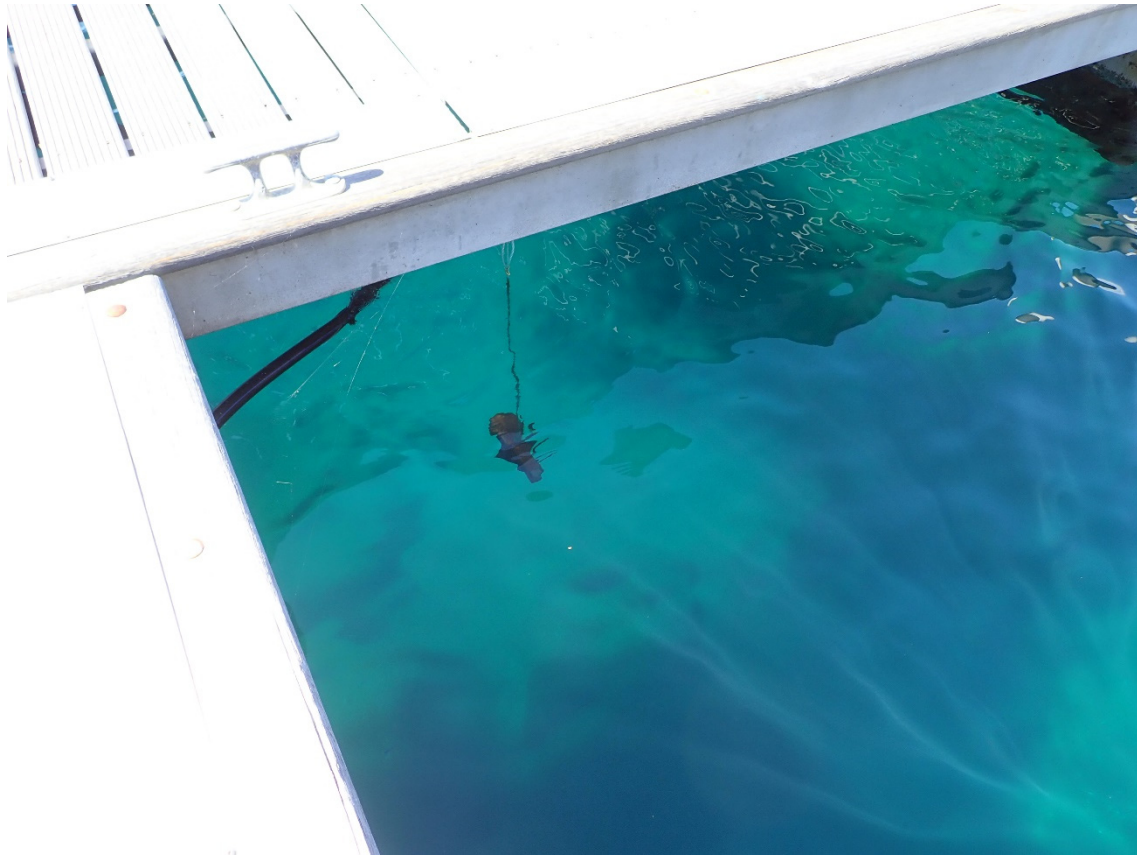

**(b)**

**Figure S3. a)** Recreational marina, **b)** Experimental unit deployed at marina. Credits: P. Ramalhosa.



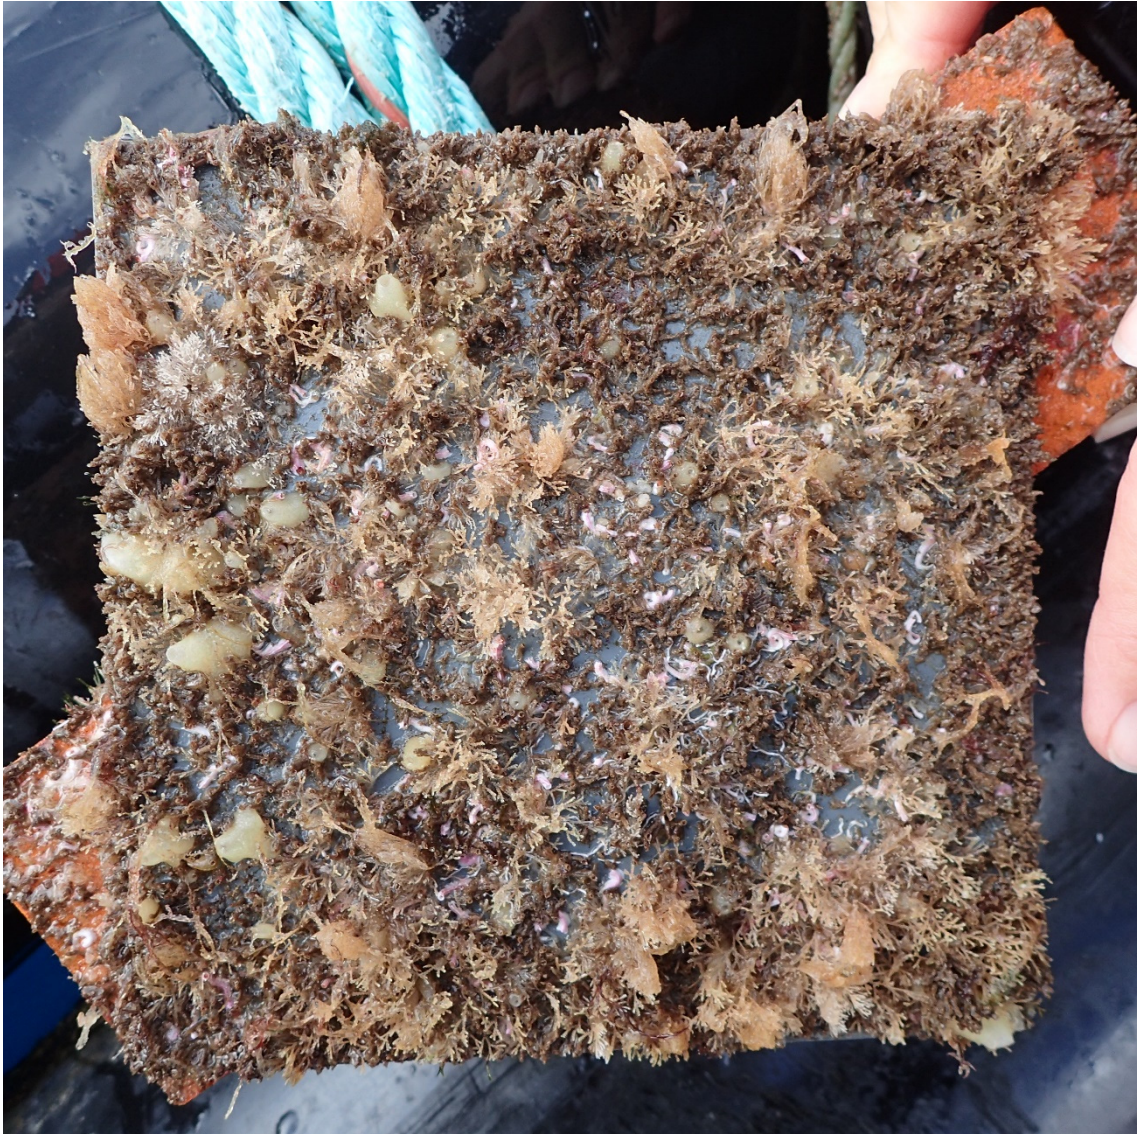

**Figure S4.** Experimental unit with biofouling. Credits: P. Ramalhosa.
